# Supplementary material for: Sono-induced cold vapour generation interfaced with capacitively coupled plasma microtorch optical emission spectrometry: analytical characterization and comparison with atomic fluorescence spectrometry
Source: Royal Society of Chemistry journal article supplement (doi:10.1039/c5ja00014a), 2015-01-01
Supplement: c5ja00014a1.pdf [file c5ja00014a1.pdf]

ESI 1. Matrix pattern in CRMs of fish tissue, soil and sediment

| Sample     | Factor dilution | Metals concentration ( $\mu\text{g L}^{-1}$ ) |       |      |      |      |       |       |       |      |      |      | Anions concentration ( $\text{mg L}^{-1}$ ) |                               |                              |                | TOC ( $\text{mg L}^{-1}$ ) | Hg Recovery (%) <sup>a</sup> |                               |
|------------|-----------------|-----------------------------------------------|-------|------|------|------|-------|-------|-------|------|------|------|---------------------------------------------|-------------------------------|------------------------------|----------------|----------------------------|------------------------------|-------------------------------|
|            |                 | Cu                                            | Pb    | Zn   | Fe   | Mn   | Co    | Ni    | Ag    | Cd   | As   | Cr   | Cl <sup>-</sup>                             | SO <sub>4</sub> <sup>2-</sup> | NO <sub>3</sub> <sup>-</sup> | F <sup>-</sup> |                            |                              | PO <sub>4</sub> <sup>3-</sup> |
| Fish       |                 |                                               |       |      |      |      |       |       |       |      |      |      |                                             |                               |                              |                |                            |                              |                               |
| BCR463     | 1000            | 0.09                                          | 0.005 | 0.4  | 1.4  | 0.04 | 0.009 | 0.05  | 0.004 | 0.02 | 0.06 | 0.02 | 0.1                                         | 0.04                          | 51                           | -              | 0.03                       | 1.6                          | 98.6±2.8                      |
| DOLT-4     | 1000            | 0.6                                           | 0.001 | 2.3  | 36   | 0.2  | 0.004 | 0.07  | 0.01  | 0.5  | 0.2  | 0.02 | 0.1                                         | 0.07                          | 53                           | -              | 0.06                       | 1.6                          | 98.1±2.8                      |
| TORT-2     | 100             | 20                                            | 0.05  | 32   | 19   | 2.5  | 0.1   | 0.5   | 0.04  | 5.2  | 3.3  | 0.1  | 0.3                                         | 0.2                           | 277                          | -              | 0.3                        | 18                           | 96.3±3.9                      |
| Soil       |                 |                                               |       |      |      |      |       |       |       |      |      |      |                                             |                               |                              |                |                            |                              |                               |
| LGC6135    | 250             | 1.6                                           | 6.4   | 5.0  | 640  | 5.2  | 0.4   | 4.3   | 0.02  | 0.01 | 1.1  | 5.8  | 0.2                                         | 0.08                          | 300                          | 63             | 0.06                       | 10                           | 96.9±6.5                      |
| LGC6141    | 100             | 2.0                                           | 3.0   | 7.0  | 1275 | 20   | 0.8   | 2.3   | 0.05  | 0.03 | 0.8  | 10   | 0.8                                         | 0.2                           | 725                          | 165            | 0.1                        | 4.3                          | 100±5.0                       |
| CRM025-050 | 12500           | 0.003                                         | 0.3   | 0.02 | 3.1  | 0.06 | 0.005 | 0.005 | 0.007 | 0.1  | 0.1  | 0.2  | 0.005                                       | 0.007                         | 6.5                          | 1.3            | 0.001                      | 0.03                         | 99.5±1.0                      |
| CRM048-50G | 5000            | 0.2                                           | 0.07  | 0.6  | 10.0 | 1.0  | 0.2   | 0.07  | 0.06  | 0.1  | 0.07 | 0.2  | 0.01                                        | 0.001                         | 16                           | 3.2            | 0.001                      | 0.05                         | 100±3.5                       |
| BCR280R    | 100             | 2.0                                           | 2.3   | 9.0  | 1550 | 25   | 1.0   | 3.0   | 0.03  | 0.03 | 1.5  | 5.5  | 0.5                                         | 0.1                           | 715                          | 150            | 0.1                        | 3.3                          | 98.6±2.8                      |
| NCS        | 25              | 8.2                                           | 12    | 40   | 5800 | 150  | 2.6   | 4.6   | 0.1   | 0.4  | 9.2  | 15   | 1.8                                         | 1.0                           | 2160                         | 525            | 0.2                        | 6.5                          | 104.5±8.7                     |
| DC78301    |                 |                                               |       |      |      |      |       |       |       |      |      |      |                                             |                               |                              |                |                            |                              |                               |

<sup>a</sup> – 95% confidence level (n = 5)
