# Supplementary material for: Sono-induced cold vapour generation interfaced with capacitively coupled plasma microtorch optical emission spectrometry: analytical characterization and comparison with atomic fluorescence spectrometry
Source: Royal Society of Chemistry journal article supplement (doi:10.1039/c5ja00014a), 2015-01-01
Supplement: c5ja00014a2.pdf [file c5ja00014a2.pdf]

ESI 2. Matrix pattern in fish and soil test samples

| Sample | Dilution factor | Metal concentration ( $\mu\text{g L}^{-1}$ ) |      |     |      |     |       |      |       |      |       | Anion concentration ( $\text{mg L}^{-1}$ ) |                 |                               |                              | TOC ( $\text{mg L}^{-1}$ ) |                |                               |
|--------|-----------------|----------------------------------------------|------|-----|------|-----|-------|------|-------|------|-------|--------------------------------------------|-----------------|-------------------------------|------------------------------|----------------------------|----------------|-------------------------------|
|        |                 | Cu                                           | Pb   | Zn  | Fe   | Mn  | Co    | Ni   | Ag    | Cd   | As    | Cr                                         | Cl <sup>-</sup> | SO <sub>4</sub> <sup>2-</sup> | NO <sub>3</sub> <sup>-</sup> |                            | F <sup>-</sup> | PO <sub>4</sub> <sup>3-</sup> |
| Fish   |                 |                                              |      |     |      |     |       |      |       |      |       |                                            |                 |                               |                              |                            |                |                               |
| F1     | 100             | 0.3                                          | 0.03 | 5.1 | 14   | 1.1 | 0.02  | 0.2  | 0.002 | -    | 0.04  | 0.05                                       | 0.4             | 0.6                           | 220                          | -                          | 0.1            | 15                            |
| F2     | 100             | 0.3                                          | 0.04 | 1.6 | 5.1  | 0.3 | 0.005 | 0.2  | 0.004 | -    | 0.04  | 0.04                                       | 0.4             | 0.5                           | 245                          | -                          | 0.3            | 12                            |
| F3     | 100             | 0.3                                          | 0.03 | 1.5 | 6.1  | 0.2 | 0.003 | 0.06 | 0.001 | -    | 0.03  | 0.07                                       | 0.3             | 0.6                           | 315                          | -                          | 0.3            | 15                            |
| F4     | 100             | 0.3                                          | 0.03 | 1.2 | 5.0  | 0.1 | 0.003 | 0.07 | 0.03  | -    | 0.004 | 0.06                                       | 0.6             | 0.5                           | 260                          | -                          | 0.2            | 40                            |
| F5     | 100             | 0.5                                          | 0.1  | 2.7 | 14   | 0.2 | 0.01  | 0.4  | 0.05  | -    | 0.06  | 0.09                                       | 0.4             | 0.5                           | 205                          | -                          | 0.1            | 17                            |
| F6     | 100             | 0.3                                          | 0.04 | 2.5 | 15   | 1.4 | 0.02  | 0.3  | 0.02  | -    | 0.2   | 0.2                                        | 0.6             | 0.4                           | 280                          | -                          | 0.3            | 13                            |
| Soil   |                 |                                              |      |     |      |     |       |      |       |      |       |                                            |                 |                               |                              |                            |                |                               |
| S1     | 100             | 10                                           | 35   | 30  | 3500 | 33  | 2.3   | 40   | 0.10  | 0.05 | 6.3   | 30                                         | 1.5             | 0.5                           | 1075                         | 78                         | 0.3            | 1.8                           |
| S2     | 100             | 3.8                                          | 6.5  | 18  | 3050 | 43  | 1.8   | 11   | 0.08  | 0.05 | 1.5   | 19                                         | 1.5             | 0.3                           | 975                          | 88                         | 0.1            | 11                            |
| S3     | 5000            | 0.5                                          | 85   | 4.5 | 950  | 20  | 16    | 3.0  | 1.5   | 30   | 30    | 30                                         | 1.0             | 2.5                           | 1100                         | 90                         | 0.08           | 0.1                           |
| S4     | 5000            | 11                                           | 3.1  | 26  | 470  | 35  | 6.3   | 6.5  | 2.6   | 5.8  | 3.5   | 8.2                                        | 0.7             | 0.05                          | 460                          | 35                         | 0.01           | 0.1                           |
| S5     | 250             | 2.0                                          | 2.1  | 8.5 | 1360 | 24  | 0.5   | 5.1  | 0.03  | 0.03 | 1.4   | 5.3                                        | 0.5             | 0.1                           | 445                          | 33                         | 0.05           | 1.2                           |
| S6     | 25              | 4.0                                          | 4.3  | 20  | 2240 | 41  | 1.0   | 5.5  | 0.06  | 0.01 | 0.2   | 4.3                                        | 1.8             | 1.0                           | 1500                         | 110                        | 0.08           | 12                            |
