# Supplementary material for: Sono-induced cold vapour generation interfaced with capacitively coupled plasma microtorch optical emission spectrometry: analytical characterization and comparison with atomic fluorescence spectrometry
Source: Royal Society of Chemistry journal article supplement (doi:10.1039/c5ja00014a), 2015-01-01
Supplement: c5ja00014a3.pdf [file c5ja00014a3.pdf]

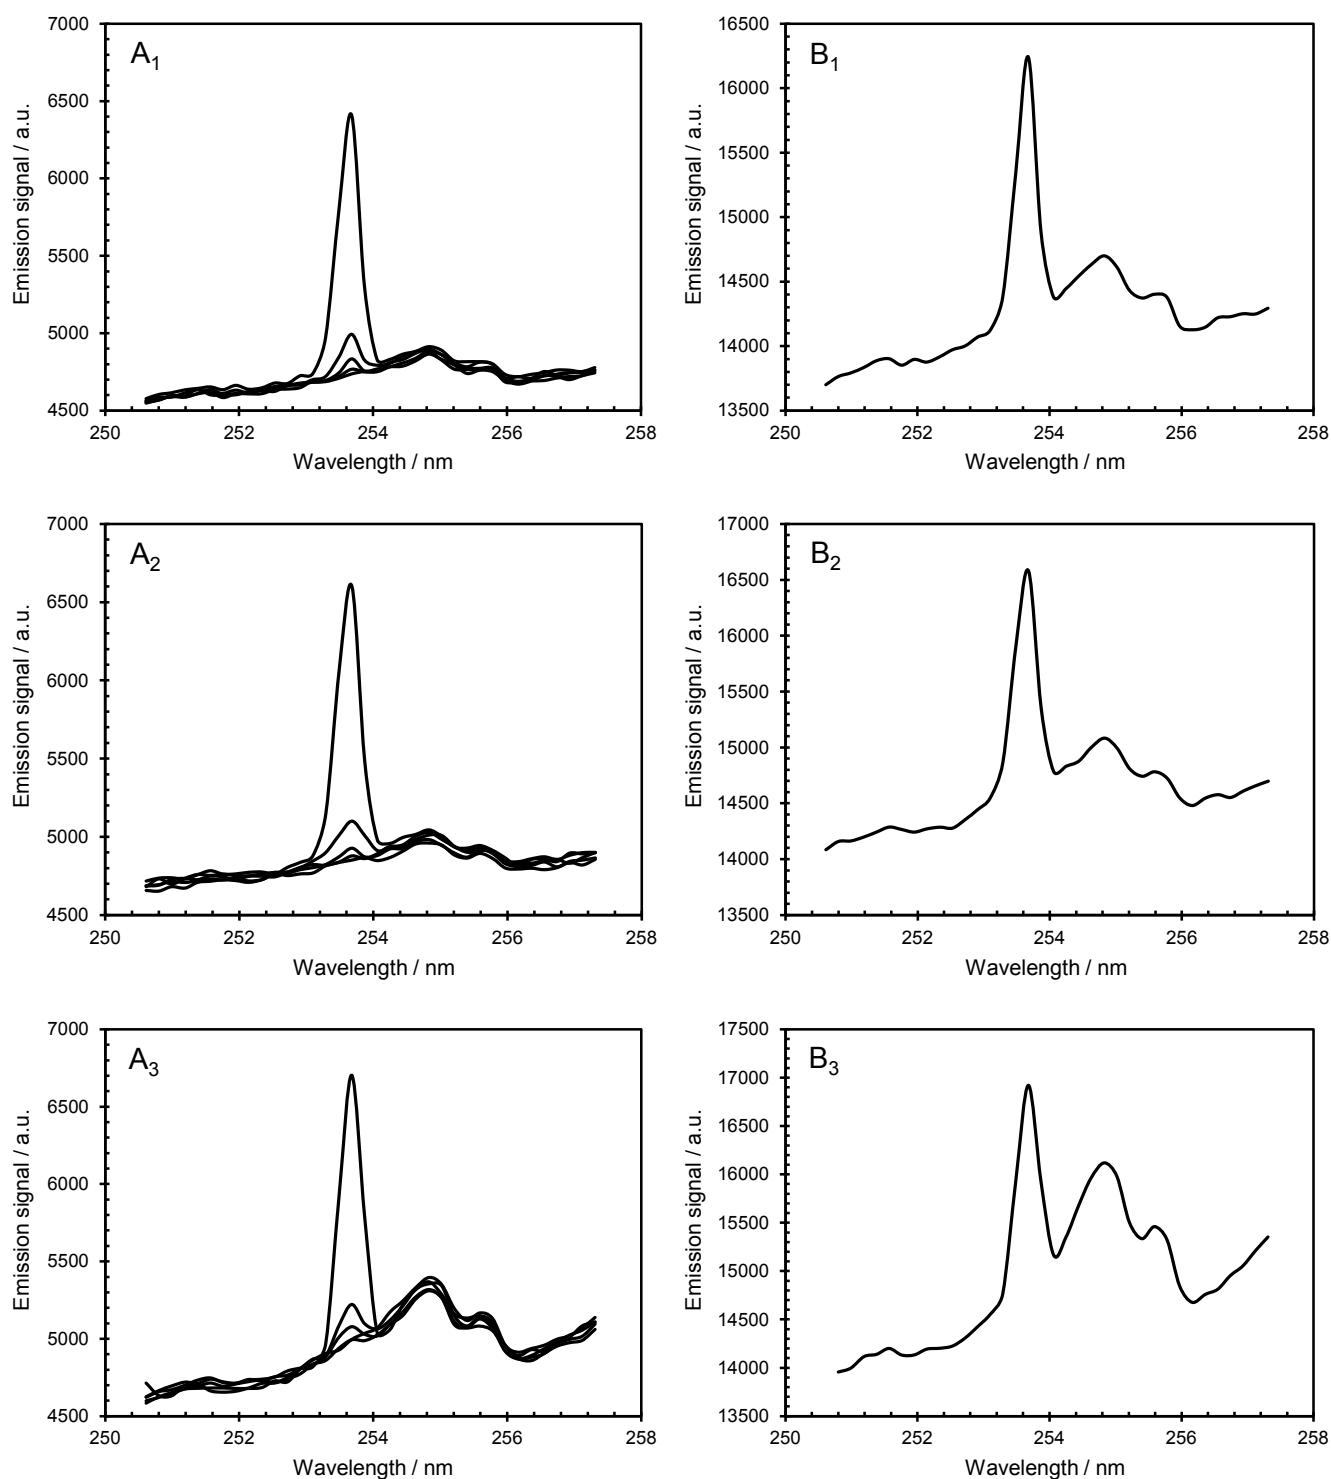

ESI 3. Episodic (A<sub>1</sub>-A<sub>3</sub>) and total emission spectra (B<sub>1</sub>-B<sub>3</sub>) of Hg recorded in 3 successive days under the optimum operating conditions in SICV- $\mu$ CAP-OES for a solution of 0.04 ng mL<sup>-1</sup> Hg (1 ng Hg in 25 mL). Optimal operating conditions: 8 min sonication time; 0.2 mol L<sup>-1</sup> formic acid; 10 W plasma power; 100 mL min<sup>-1</sup> Ar flow rate; 0.8 mm observation height.
